# Supplementary material for: Ion chemistry at elevated ion–molecule interaction energies in a selected ion flow-drift tube: reactions of H3O+, NO+ and O2+ with saturated aliphatic ketones
Source: Royal Society of Chemistry journal article supplement (doi:10.1039/c7cp05795d), 2017-01-01
Supplement: c7cp05795d1.pdf [file c7cp05795d1.pdf]

Supplementary Information

# Ion chemistry at elevated ion-molecule interaction energies in a selected ion flow-drift tube: reactions of $\text{H}_3\text{O}^+$ , $\text{NO}^+$ and $\text{O}_2^+$ with saturated aliphatic ketones

Anatolii Spesyvyi, David Smith and Patrik Španěl

J. Heyrovský Institute of Physical Chemistry of the Czech Academy of Sciences, Dolejškova 3,  
18223 Prague 8, Czech Republic.

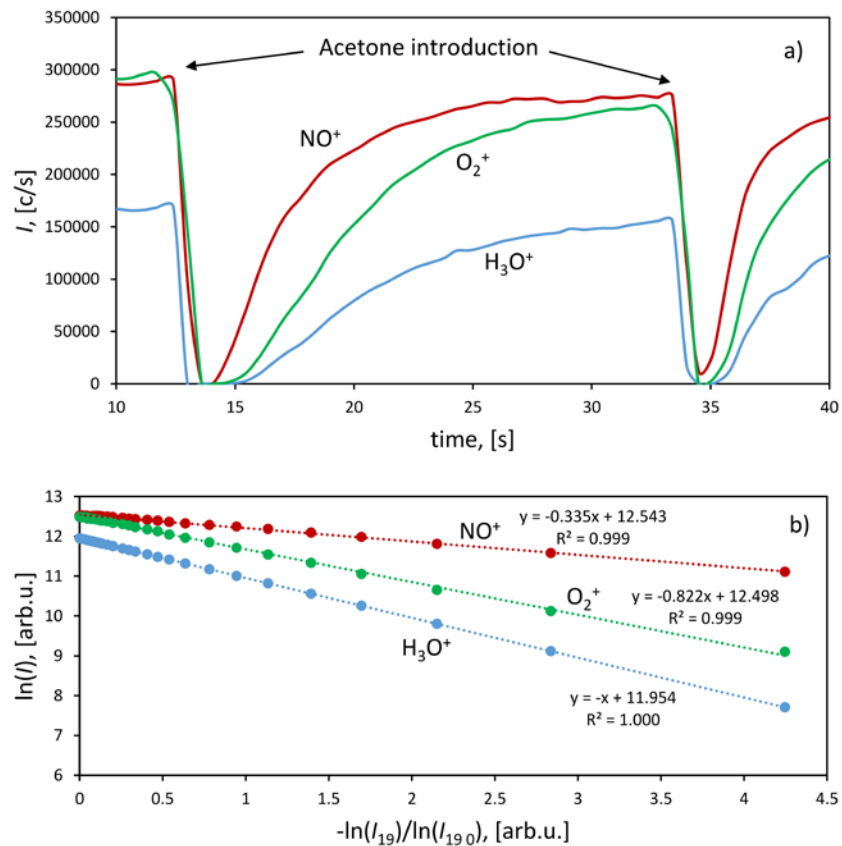

**Fig. S1.** Method of measurement of the rate coefficients for the  $\text{NO}^+$  and  $\text{O}_2^+$  acetone reactions relatively to the  $\text{H}_3\text{O}^+$  reaction at  $E/N$  of 14.3 Td and drift tube pressure of 2 mbar. A Multi Ion Monitoring time profile of three reagent ion count rates obtained whilst introducing a variable acetone concentration into the inlet system is shown in a) and the corresponding ion signal decay plots are shown in b), where dotted lines represent linear regression fits. The slopes of these lines define relative reaction rate coefficients as  $k\{\text{NO}^+\}=0.335k\{\text{H}_3\text{O}^+\}$  and  $k\{\text{O}_2^+\}=0.822k\{\text{H}_3\text{O}^+\}$ .

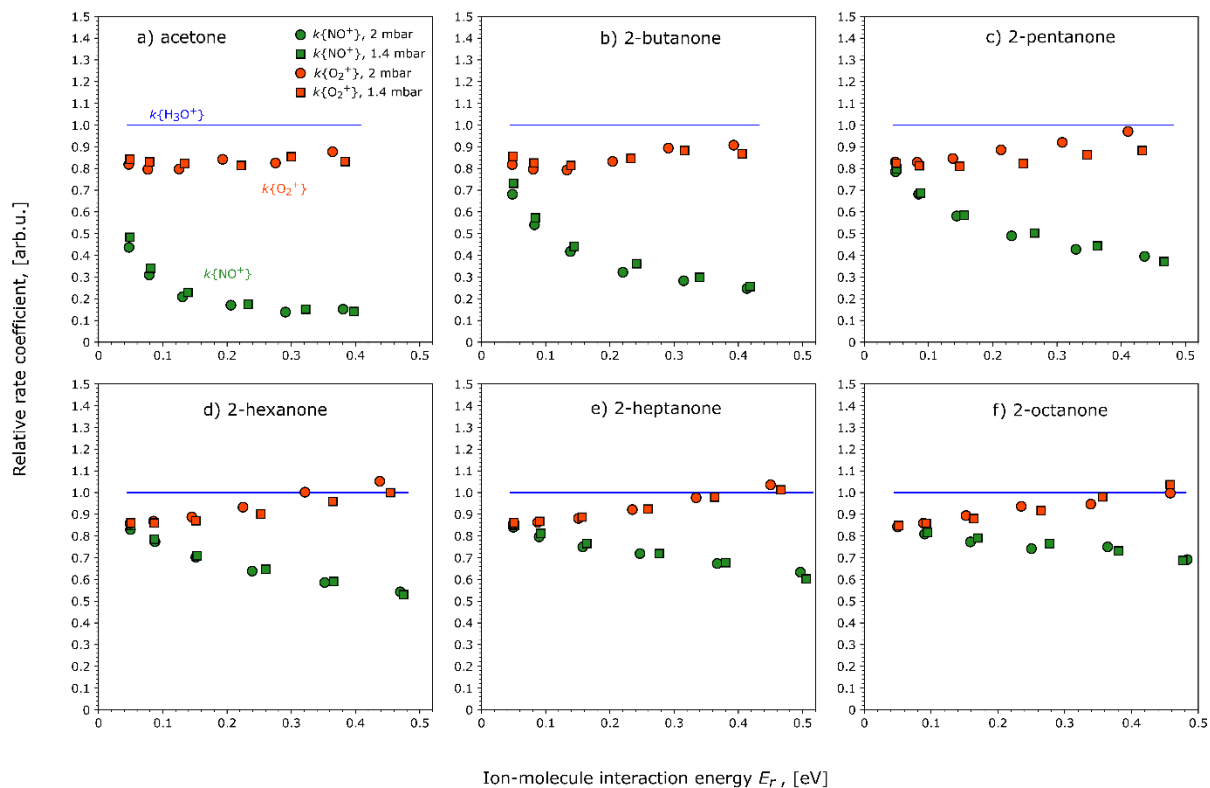

**Fig. S2.** Plots of the dependence of the experimentally derived relative reaction rate coefficients,  $k$ , for the  $\text{NO}^+$  and  $\text{O}_2^+$  ketone reactions with respect to the  $\text{H}_3\text{O}^+$  rate coefficients as functions of the ion-molecule interaction energy  $E_r$  obtained at a flow-drift tube pressure of 1.4 (filled squares) and 2 mbar (filled circles).

**Table S1. Rate coefficients for the NO<sup>+</sup> and O<sub>2</sub><sup>+</sup> reactions with the ketones indicated as determined experimentally relatively to H<sub>3</sub>O<sup>+</sup> rate coefficients at the six *E/N* values indicated for drift tube pressures of 1.4 and 2 mbar. Note that relative values are shown in *Italic*.**

| <u>1.4 mbar, 45 mL/min, 1.5 mL/min</u> |                           |                                                                                  |                           |                                                                                              | <u>2 mbar, 75mL/min, 3mL/min</u> |                           |                                                                                  |                           |                                                                                              |             |      |             |             |
|----------------------------------------|---------------------------|----------------------------------------------------------------------------------|---------------------------|----------------------------------------------------------------------------------------------|----------------------------------|---------------------------|----------------------------------------------------------------------------------|---------------------------|----------------------------------------------------------------------------------------------|-------------|------|-------------|-------------|
| <i>E/N</i> , Td                        | <i>E<sub>r</sub></i> , eV | <i>k</i> {NO <sup>+</sup> },<br>10 <sup>-9</sup> cm <sup>3</sup> s <sup>-1</sup> | <i>E<sub>r</sub></i> , eV | <i>k</i> {O <sub>2</sub> <sup>+</sup> },<br>10 <sup>-9</sup> cm <sup>3</sup> s <sup>-1</sup> | <i>E/N</i> , Td                  | <i>E<sub>r</sub></i> , eV | <i>k</i> {NO <sup>+</sup> },<br>10 <sup>-9</sup> cm <sup>3</sup> s <sup>-1</sup> | <i>E<sub>r</sub></i> , eV | <i>k</i> {O <sub>2</sub> <sup>+</sup> },<br>10 <sup>-9</sup> cm <sup>3</sup> s <sup>-1</sup> |             |      |             |             |
| Acetone                                |                           |                                                                                  |                           |                                                                                              |                                  |                           |                                                                                  |                           |                                                                                              |             |      |             |             |
| 6.5                                    | 0.05                      | <b>1.74</b>                                                                      | <i>0.48</i>               | 0.05                                                                                         | <b>3.27</b>                      | <i>0.84</i>               | 7.2                                                                              | 0.05                      | <b>1.93</b>                                                                                  | <i>0.44</i> | 0.05 | <b>3.36</b> | <i>0.82</i> |
| 13.3                                   | 0.08                      | <b>1.15</b>                                                                      | <i>0.34</i>               | 0.08                                                                                         | <b>2.97</b>                      | <i>0.83</i>               | 14.3                                                                             | 0.08                      | <b>1.27</b>                                                                                  | <i>0.31</i> | 0.08 | <b>3.09</b> | <i>0.80</i> |
| 20.5                                   | 0.14                      | <b>0.73</b>                                                                      | <i>0.23</i>               | 0.13                                                                                         | <b>2.78</b>                      | <i>0.82</i>               | 21.4                                                                             | 0.13                      | <b>0.80</b>                                                                                  | <i>0.21</i> | 0.13 | <b>2.87</b> | <i>0.80</i> |
| 28.6                                   | 0.23                      | <b>0.56</b>                                                                      | <i>0.17</i>               | 0.22                                                                                         | <b>2.78</b>                      | <i>0.81</i>               | 28.4                                                                             | 0.21                      | <b>0.58</b>                                                                                  | <i>0.17</i> | 0.19 | <b>2.69</b> | <i>0.84</i> |
| 35.0                                   | 0.32                      | <b>0.43</b>                                                                      | <i>0.15</i>               | 0.30                                                                                         | <b>2.59</b>                      | <i>0.85</i>               | 35.4                                                                             | 0.29                      | <b>0.48</b>                                                                                  | <i>0.14</i> | 0.28 | <b>2.68</b> | <i>0.83</i> |
| 40.6                                   | 0.40                      | <b>0.45</b>                                                                      | <i>0.14</i>               | 0.38                                                                                         | <b>2.61</b>                      | <i>0.83</i>               | 42.3                                                                             | 0.38                      | <b>0.42</b>                                                                                  | <i>0.15</i> | 0.36 | <b>2.47</b> | <i>0.88</i> |
| 2-butanone                             |                           |                                                                                  |                           |                                                                                              |                                  |                           |                                                                                  |                           |                                                                                              |             |      |             |             |
| 6.5                                    | 0.05                      | <b>2.80</b>                                                                      | <i>0.73</i>               | 0.05                                                                                         | <b>3.36</b>                      | <i>0.86</i>               | 7.2                                                                              | 0.05                      | <b>3.01</b>                                                                                  | <i>0.68</i> | 0.05 | <b>3.51</b> | <i>0.82</i> |
| 13.3                                   | 0.08                      | <b>2.08</b>                                                                      | <i>0.57</i>               | 0.08                                                                                         | <b>3.06</b>                      | <i>0.83</i>               | 14.3                                                                             | 0.08                      | <b>2.20</b>                                                                                  | <i>0.54</i> | 0.08 | <b>3.17</b> | <i>0.80</i> |
| 20.5                                   | 0.14                      | <b>1.51</b>                                                                      | <i>0.44</i>               | 0.14                                                                                         | <b>2.87</b>                      | <i>0.81</i>               | 21.4                                                                             | 0.14                      | <b>1.59</b>                                                                                  | <i>0.42</i> | 0.13 | <b>2.94</b> | <i>0.79</i> |
| 28.6                                   | 0.24                      | <b>1.11</b>                                                                      | <i>0.36</i>               | 0.23                                                                                         | <b>2.86</b>                      | <i>0.85</i>               | 28.4                                                                             | 0.22                      | <b>1.24</b>                                                                                  | <i>0.32</i> | 0.20 | <b>2.90</b> | <i>0.83</i> |
| 35.0                                   | 0.34                      | <b>0.92</b>                                                                      | <i>0.30</i>               | 0.32                                                                                         | <b>2.89</b>                      | <i>0.88</i>               | 35.4                                                                             | 0.31                      | <b>0.97</b>                                                                                  | <i>0.28</i> | 0.29 | <b>2.86</b> | <i>0.89</i> |
| 40.6                                   | 0.42                      | <b>0.75</b>                                                                      | <i>0.26</i>               | 0.41                                                                                         | <b>2.76</b>                      | <i>0.87</i>               | 42.3                                                                             | 0.41                      | <b>0.78</b>                                                                                  | <i>0.25</i> | 0.39 | <b>2.64</b> | <i>0.91</i> |
| 2-pentanone                            |                           |                                                                                  |                           |                                                                                              |                                  |                           |                                                                                  |                           |                                                                                              |             |      |             |             |
| 6.5                                    | 0.05                      | <b>3.17</b>                                                                      | <i>0.80</i>               | 0.05                                                                                         | <b>3.35</b>                      | <i>0.82</i>               | 7.2                                                                              | 0.05                      | <b>3.22</b>                                                                                  | <i>0.78</i> | 0.05 | <b>3.33</b> | <i>0.83</i> |
| 13.3                                   | 0.09                      | <b>2.59</b>                                                                      | <i>0.69</i>               | 0.09                                                                                         | <b>3.15</b>                      | <i>0.81</i>               | 14.3                                                                             | 0.08                      | <b>2.61</b>                                                                                  | <i>0.68</i> | 0.08 | <b>3.09</b> | <i>0.83</i> |
| 20.5                                   | 0.16                      | <b>2.10</b>                                                                      | <i>0.59</i>               | 0.15                                                                                         | <b>3.06</b>                      | <i>0.81</i>               | 21.4                                                                             | 0.14                      | <b>2.11</b>                                                                                  | <i>0.58</i> | 0.14 | <b>2.93</b> | <i>0.85</i> |
| 28.6                                   | 0.27                      | <b>1.67</b>                                                                      | <i>0.50</i>               | 0.25                                                                                         | <b>3.03</b>                      | <i>0.82</i>               | 28.4                                                                             | 0.23                      | <b>1.72</b>                                                                                  | <i>0.49</i> | 0.21 | <b>2.81</b> | <i>0.89</i> |
| 35.0                                   | 0.36                      | <b>1.35</b>                                                                      | <i>0.44</i>               | 0.35                                                                                         | <b>2.91</b>                      | <i>0.86</i>               | 35.4                                                                             | 0.33                      | <b>1.40</b>                                                                                  | <i>0.43</i> | 0.31 | <b>2.73</b> | <i>0.92</i> |
| 40.5                                   | 0.47                      | <b>1.15</b>                                                                      | <i>0.37</i>               | 0.43                                                                                         | <b>2.81</b>                      | <i>0.88</i>               | 42.3                                                                             | 0.44                      | <b>1.07</b>                                                                                  | <i>0.40</i> | 0.41 | <b>2.56</b> | <i>0.97</i> |
| 2-hexanone                             |                           |                                                                                  |                           |                                                                                              |                                  |                           |                                                                                  |                           |                                                                                              |             |      |             |             |
| 6.5                                    | 0.05                      | <b>3.44</b>                                                                      | <i>0.85</i>               | 0.05                                                                                         | <b>3.55</b>                      | <i>0.86</i>               | 7.2                                                                              | 0.05                      | <b>3.51</b>                                                                                  | <i>0.83</i> | 0.05 | <b>3.56</b> | <i>0.86</i> |
| 13.3                                   | 0.09                      | <b>3.04</b>                                                                      | <i>0.78</i>               | 0.09                                                                                         | <b>3.41</b>                      | <i>0.86</i>               | 14.3                                                                             | 0.09                      | <b>3.08</b>                                                                                  | <i>0.77</i> | 0.09 | <b>3.37</b> | <i>0.87</i> |
| 20.5                                   | 0.15                      | <b>2.62</b>                                                                      | <i>0.71</i>               | 0.15                                                                                         | <b>3.31</b>                      | <i>0.87</i>               | 21.4                                                                             | 0.15                      | <b>2.64</b>                                                                                  | <i>0.70</i> | 0.15 | <b>3.24</b> | <i>0.89</i> |
| 28.6                                   | 0.26                      | <b>2.24</b>                                                                      | <i>0.65</i>               | 0.25                                                                                         | <b>3.27</b>                      | <i>0.90</i>               | 28.4                                                                             | 0.24                      | <b>2.27</b>                                                                                  | <i>0.64</i> | 0.22 | <b>3.16</b> | <i>0.93</i> |
| 35.0                                   | 0.37                      | <b>1.87</b>                                                                      | <i>0.59</i>               | 0.36                                                                                         | <b>3.19</b>                      | <i>0.96</i>               | 35.4                                                                             | 0.35                      | <b>1.88</b>                                                                                  | <i>0.59</i> | 0.32 | <b>3.06</b> | <i>1.00</i> |
| 40.6                                   | 0.47                      | <b>1.56</b>                                                                      | <i>0.53</i>               | 0.45                                                                                         | <b>3.03</b>                      | <i>1.00</i>               | 42.3                                                                             | 0.47                      | <b>1.53</b>                                                                                  | <i>0.54</i> | 0.44 | <b>2.88</b> | <i>1.05</i> |

1.4 mbar, 45 mL/min, 1.5 mL/min

2 mbar, 75mL/min, 3mL/min

| <i>E/N</i> , Td | <i>E<sub>r</sub></i> , eV | <i>k</i> {NO <sup>+</sup> },<br>10 <sup>-9</sup> cm <sup>3</sup> s <sup>-1</sup> | <i>E<sub>r</sub></i> , eV | <i>k</i> {O <sub>2</sub> <sup>+</sup> },<br>10 <sup>-9</sup> cm <sup>3</sup> s <sup>-1</sup> | <i>E/N</i> , Td | <i>E<sub>r</sub></i> , eV | <i>k</i> {NO <sup>+</sup> },<br>10 <sup>-9</sup> cm <sup>3</sup> s <sup>-1</sup> | <i>E<sub>r</sub></i> , eV | <i>k</i> {O <sub>2</sub> <sup>+</sup> },<br>10 <sup>-9</sup> cm <sup>3</sup> s <sup>-1</sup> |      |      |             |      |
|-----------------|---------------------------|----------------------------------------------------------------------------------|---------------------------|----------------------------------------------------------------------------------------------|-----------------|---------------------------|----------------------------------------------------------------------------------|---------------------------|----------------------------------------------------------------------------------------------|------|------|-------------|------|
| 2-heptanone     |                           |                                                                                  |                           |                                                                                              |                 |                           |                                                                                  |                           |                                                                                              |      |      |             |      |
| 6.5             | 0.05                      | <b>3.45</b>                                                                      | 0.85                      | 0.05                                                                                         | <b>3.52</b>     | 0.86                      | 7.2                                                                              | 0.05                      | <b>3.49</b>                                                                                  | 0.84 | 0.05 | <b>3.54</b> | 0.86 |
| 13.3            | 0.09                      | <b>3.12</b>                                                                      | 0.81                      | 0.09                                                                                         | <b>3.39</b>     | 0.87                      | 14.3                                                                             | 0.09                      | <b>3.19</b>                                                                                  | 0.80 | 0.09 | <b>3.40</b> | 0.86 |
| 20.5            | 0.16                      | <b>2.79</b>                                                                      | 0.77                      | 0.16                                                                                         | <b>3.28</b>     | 0.89                      | 21.4                                                                             | 0.16                      | <b>2.85</b>                                                                                  | 0.75 | 0.15 | <b>3.30</b> | 0.88 |
| 28.5            | 0.28                      | <b>2.48</b>                                                                      | 0.72                      | 0.26                                                                                         | <b>3.18</b>     | 0.92                      | 28.4                                                                             | 0.25                      | <b>2.48</b>                                                                                  | 0.72 | 0.23 | <b>3.19</b> | 0.92 |
| 35.0            | 0.38                      | <b>2.07</b>                                                                      | 0.68                      | 0.36                                                                                         | <b>3.00</b>     | 0.98                      | 35.3                                                                             | 0.37                      | <b>2.08</b>                                                                                  | 0.67 | 0.33 | <b>3.01</b> | 0.98 |
| 40.5            | 0.51                      | <b>1.79</b>                                                                      | 0.60                      | 0.47                                                                                         | <b>2.93</b>     | 1.01                      | 42.3                                                                             | 0.50                      | <b>1.70</b>                                                                                  | 0.63 | 0.45 | <b>2.86</b> | 1.04 |
| 2-octanone      |                           |                                                                                  |                           |                                                                                              |                 |                           |                                                                                  |                           |                                                                                              |      |      |             |      |
| 6.5             | 0.05                      | <b>3.61</b>                                                                      | 0.85                      | 0.05                                                                                         | <b>3.62</b>     | 0.85                      | 7.1                                                                              | 0.05                      | <b>3.64</b>                                                                                  | 0.84 | 0.05 | <b>3.64</b> | 0.84 |
| 13.3            | 0.09                      | <b>3.32</b>                                                                      | 0.82                      | 0.09                                                                                         | <b>3.53</b>     | 0.86                      | 14.3                                                                             | 0.09                      | <b>3.35</b>                                                                                  | 0.81 | 0.09 | <b>3.52</b> | 0.86 |
| 20.4            | 0.17                      | <b>3.01</b>                                                                      | 0.79                      | 0.16                                                                                         | <b>3.48</b>     | 0.88                      | 21.4                                                                             | 0.16                      | <b>3.08</b>                                                                                  | 0.77 | 0.15 | <b>3.43</b> | 0.89 |
| 28.5            | 0.28                      | <b>2.66</b>                                                                      | 0.76                      | 0.26                                                                                         | <b>3.36</b>     | 0.92                      | 28.4                                                                             | 0.25                      | <b>2.74</b>                                                                                  | 0.74 | 0.23 | <b>3.29</b> | 0.94 |
| 34.9            | 0.38                      | <b>2.41</b>                                                                      | 0.73                      | 0.36                                                                                         | <b>3.04</b>     | 0.98                      | 35.3                                                                             | 0.36                      | <b>2.35</b>                                                                                  | 0.75 | 0.34 | <b>3.15</b> | 0.95 |
| 40.4            | 0.48                      | <b>2.05</b>                                                                      | 0.69                      | 0.46                                                                                         | <b>2.96</b>     | 1.04                      | 42.2                                                                             | 0.48                      | <b>2.04</b>                                                                                  | 0.69 | 0.46 | <b>3.08</b> | 1.00 |

**Table S2. Product ion distributions for the NO<sup>+</sup> and O<sub>2</sub><sup>+</sup> reactions with the ketones indicated at six reduced electric field strengths  $E/N$  in the range of 7-44 Td, drift tube pressure of 2 mbar and corresponding reagent ion-neutral ketone interaction energies  $E_r$ .**

| NO <sup>+</sup> |               |           |           |            |            | O <sub>2</sub> <sup>+</sup> |               |           |           |           |           |            |
|-----------------|---------------|-----------|-----------|------------|------------|-----------------------------|---------------|-----------|-----------|-----------|-----------|------------|
| Acetone         |               |           |           |            |            |                             |               |           |           |           |           |            |
| $E/N$ ,<br>Td   | $E_r$ ,<br>eV | m/z<br>43 | m/z<br>58 | m/z<br>88  |            | $E/N$ ,<br>Td               | $E_r$ ,<br>eV | m/z<br>43 | m/z<br>58 |           |           |            |
| 7.2             | 0.05          | 1%        | 4%        | 95%        |            | 7.3                         | 0.05          | 27%       | 73%       |           |           |            |
| 14.5            | 0.09          | 5%        | 11%       | 84%        |            | 14.7                        | 0.08          | 28%       | 72%       |           |           |            |
| 21.7            | 0.15          | 5%        | 15%       | 79%        |            | 21.8                        | 0.13          | 31%       | 69%       |           |           |            |
| 28.8            | 0.23          | 14%       | 23%       | 63%        |            | 29.0                        | 0.20          | 41%       | 59%       |           |           |            |
| 35.9            | 0.33          | 35%       | 23%       | 42%        |            | 36.0                        | 0.28          | 65%       | 35%       |           |           |            |
| 42.9            | 0.47          | 68%       | 8%        | 23%        |            | 43.1                        | 0.38          | 87%       | 13%       |           |           |            |
| 2-butanone      |               |           |           |            |            |                             |               |           |           |           |           |            |
| $E/N$ ,<br>Td   | $E_r$ ,<br>eV | m/z<br>43 | m/z<br>57 | m/z7<br>2  | m/z1<br>02 | $E/N$ ,<br>Td               | $E_r$ ,<br>eV | m/z<br>43 | m/z<br>57 | m/z<br>72 |           |            |
| 7.2             | 0.05          | 1%        | 1%        | 1%         | 97%        | 7.3                         | 0.05          | 17%       | 22%       | 61%       |           |            |
| 14.5            | 0.09          | 2%        | 2%        | 5%         | 92%        | 14.6                        | 0.08          | 19%       | 23%       | 58%       |           |            |
| 21.7            | 0.16          | 1%        | 2%        | 7%         | 90%        | 21.9                        | 0.14          | 20%       | 24%       | 56%       |           |            |
| 28.8            | 0.25          | 3%        | 7%        | 12%        | 77%        | 29.1                        | 0.22          | 22%       | 29%       | 49%       |           |            |
| 35.8            | 0.34          | 6%        | 16%       | 17%        | 61%        | 36.1                        | 0.30          | 24%       | 36%       | 40%       |           |            |
| 42.9            | 0.49          | 8%        | 26%       | 19%        | 47%        | 43.1                        | 0.40          | 25%       | 41%       | 34%       |           |            |
| 2-pentanone     |               |           |           |            |            |                             |               |           |           |           |           |            |
| $E/N$ ,<br>Td   | $E_r$ ,<br>eV | m/z<br>58 | m/z<br>71 | m/z<br>86  | m/z<br>116 | $E/N$ ,<br>Td               | $E_r$ ,<br>eV | m/z<br>43 | m/z<br>58 | m/z<br>71 | m/z<br>86 |            |
| 7.3             | 0.05          | 0%        | 1%        | 1%         | 98%        | 7.3                         | 0.05          | 16%       | 21%       | 19%       | 44%       |            |
| 14.6            | 0.09          | 1%        | 1%        | 4%         | 93%        | 14.6                        | 0.09          | 17%       | 24%       | 19%       | 41%       |            |
| 21.8            | 0.16          | 2%        | 1%        | 8%         | 89%        | 21.7                        | 0.15          | 18%       | 24%       | 19%       | 39%       |            |
| 28.9            | 0.26          | 3%        | 2%        | 15%        | 80%        | 28.9                        | 0.24          | 19%       | 24%       | 19%       | 38%       |            |
| 36.1            | 0.35          | 6%        | 3%        | 20%        | 71%        | 36.1                        | 0.35          | 21%       | 24%       | 20%       | 35%       |            |
| 43.1            | 0.49          | 9%        | 4%        | 26%        | 60%        | 43.1                        | 0.43          | 23%       | 25%       | 20%       | 31%       |            |
| 2-hexanone      |               |           |           |            |            |                             |               |           |           |           |           |            |
| $E/N$ ,<br>Td   | $E_r$ ,<br>eV | m/z<br>58 | m/z<br>85 | m/z<br>100 | m/z<br>130 | $E/N$ ,<br>Td               | $E_r$ ,<br>eV | m/z<br>43 | m/z<br>58 | m/z<br>71 | m/z<br>99 | m/z<br>114 |
| 7.4             | 0.05          | 1%        | 0%        | 2%         | 97%        | 7.3                         | 0.05          | 9%        | 46%       | 7%        | 8%        | 30%        |
| 14.8            | 0.10          | 4%        | 1%        | 7%         | 88%        | 14.6                        | 0.09          | 7%        | 49%       | 6%        | 8%        | 31%        |
| 22.0            | 0.17          | 4%        | 1%        | 11%        | 84%        | 21.9                        | 0.15          | 6%        | 49%       | 7%        | 7%        | 31%        |
| 29.2            | 0.28          | 7%        | 1%        | 17%        | 75%        | 29.0                        | 0.24          | 5%        | 48%       | 7%        | 8%        | 33%        |
| 36.4            | 0.43          | 13%       | 2%        | 27%        | 58%        | 36.1                        | 0.33          | 6%        | 49%       | 8%        | 8%        | 29%        |
| 43.5            | 0.55          | 21%       | 5%        | 37%        | 37%        | 43.1                        | 0.45          | 6%        | 51%       | 9%        | 8%        | 27%        |

| NO <sup>+</sup>    |                              |                  |                  |                  |                   |                   |                   | O <sub>2</sub> <sup>+</sup> |                              |                  |                  |                  |                  |                   |                   |
|--------------------|------------------------------|------------------|------------------|------------------|-------------------|-------------------|-------------------|-----------------------------|------------------------------|------------------|------------------|------------------|------------------|-------------------|-------------------|
| 2-heptanone        |                              |                  |                  |                  |                   |                   |                   |                             |                              |                  |                  |                  |                  |                   |                   |
| <i>E/N</i> ,<br>Td | <i>E<sub>r</sub></i> ,<br>eV | <i>m/z</i><br>58 | <i>m/z</i><br>72 | <i>m/z</i><br>85 | <i>m/z</i><br>99  | <i>m/z</i><br>114 | <i>m/z</i><br>144 | <i>E/N</i> ,<br>Td          | <i>E<sub>r</sub></i> ,<br>eV | <i>m/z</i><br>43 | <i>m/z</i><br>58 | <i>m/z</i><br>71 | <i>m/z</i><br>99 | <i>m/z</i><br>114 |                   |
| 7.4                | 0.05                         | 2%               | 0%               | 0%               | 1%                | 4%                | 93%               | 7.3                         | 0.05                         | 9%               | 46%              | 7%               | 8%               | 30%               |                   |
| 14.9               | 0.09                         | 10%              | 1%               | 1%               | 1%                | 12%               | 75%               | 14.6                        | 0.09                         | 7%               | 49%              | 6%               | 8%               | 31%               |                   |
| 22.2               | 0.17                         | 7%               | 2%               | 2%               | 1%                | 21%               | 67%               | 21.9                        | 0.15                         | 6%               | 49%              | 7%               | 7%               | 31%               |                   |
| 29.5               | 0.27                         | 10%              | 1%               | 2%               | 1%                | 31%               | 55%               | 29.0                        | 0.24                         | 5%               | 48%              | 7%               | 8%               | 33%               |                   |
| 36.6               | 0.37                         | 13%              | 3%               | 2%               | 3%                | 35%               | 44%               | 36.1                        | 0.33                         | 6%               | 49%              | 8%               | 8%               | 29%               |                   |
| 43.9               | 0.53                         | 18%              | 4%               | 3%               | 2%                | 41%               | 31%               | 43.1                        | 0.45                         | 6%               | 51%              | 9%               | 8%               | 27%               |                   |
| 2-octanone         |                              |                  |                  |                  |                   |                   |                   |                             |                              |                  |                  |                  |                  |                   |                   |
| <i>E/N</i> ,<br>Td | <i>E<sub>r</sub></i> ,<br>eV | <i>m/z</i><br>58 | <i>m/z</i><br>85 | <i>m/z</i><br>98 | <i>m/z</i><br>113 | <i>m/z</i><br>128 | <i>m/z</i><br>158 | <i>E/N</i> ,<br>Td          | <i>E<sub>r</sub></i> ,<br>eV | <i>m/z</i><br>43 | <i>m/z</i><br>58 | <i>m/z</i><br>71 | <i>m/z</i><br>85 | <i>m/z</i><br>113 | <i>m/z</i><br>128 |
| 7.4                | 0.05                         | 1%               | 0%               | 0%               | 1%                | 0%                | 98%               | 7.3                         | 0.05                         | 7%               | 48%              | 8%               | 4%               | 5%                | 28%               |
| 14.9               | 0.10                         | 5%               | 0%               | 1%               | 1%                | 9%                | 83%               | 14.7                        | 0.09                         | 5%               | 48%              | 7%               | 5%               | 5%                | 30%               |
| 22.2               | 0.18                         | 6%               | 1%               | 2%               | 2%                | 17%               | 72%               | 21.8                        | 0.15                         | 4%               | 49%              | 7%               | 5%               | 6%                | 30%               |
| 29.5               | 0.29                         | 7%               | 1%               | 3%               | 3%                | 24%               | 61%               | 29.0                        | 0.25                         | 3%               | 46%              | 7%               | 6%               | 6%                | 32%               |
| 36.8               | 0.41                         | 11%              | 2%               | 3%               | 4%                | 31%               | 48%               | 36.1                        | 0.34                         | 4%               | 47%              | 7%               | 5%               | 7%                | 30%               |
| 44.0               | 0.55                         | 13%              | 3%               | 4%               | 6%                | 33%               | 42%               | 43.1                        | 0.46                         | 4%               | 48%              | 8%               | 6%               | 8%                | 26%               |
